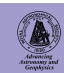

# Runaway stars masquerading as star formation in galactic outskirts

Eric P. Andersson<sup>1</sup>,<sup>\*</sup> Florent Renaud<sup>1</sup> and Oscar Agertz<sup>1</sup>

*Department of Astronomy and Theoretical Physics, Lund Observatory, Box 43, SE-221 00 Lund, Sweden*

Accepted 2020 December 10. Received 2020 December 7; in original form 2020 October 22

## ABSTRACT

In the outskirts of nearby spiral galaxies, star formation is observed in extremely low gas surface densities. Star formation in these regions, where the interstellar medium is dominated by diffuse atomic hydrogen, is difficult to explain with classic star formation theories. In this letter, we introduce runaway stars as an explanation for this observation. Runaway stars, produced by collisional dynamics in young stellar clusters, can travel kiloparsecs during their main-sequence lifetime. Using galactic-scale hydrodynamic simulations including a treatment of individual stars, we demonstrate that this mechanism enables the ejection of young massive stars into environments where the gas is not dense enough to trigger star formation. This results in the appearance of star formation in regions where it ought to be impossible. We conclude that runaway stars are a contributing, if not dominant, factor to the observations of star formation in the outskirts of spiral galaxies.

**Key words:** stars: kinematics and dynamics – ISM: evolution – galaxies: star formation.

## 1 INTRODUCTION

Schmidt (1959) suggested that the relationship between the star formation rate (SFR) density  $\Sigma_{\text{SFR}}$  and gas surface density  $\Sigma_g$ , commonly referred to as the star formation (SF) relation, follows a power law. The canonical SF relation is typically quoted with a slope of 1.4 with a break appearing at a critical threshold (e.g. Kennicutt 1989, 1998; Kennicutt & Evans 2012). The break occurs at  $\sim 10 \text{ M}_\odot \text{ pc}^{-2}$  and is attributed to the transition between molecular hydrogen  $\text{H}_2$  and neutral atomic hydrogen  $\text{HI}$  (Wong & Blitz 2002; Kennicutt et al. 2007; Bigiel et al. 2008; Bolatto et al. 2011). However, the underlying reasons of the transition are debated; for a review, see, for example, Schaye (2004), Krumholz & McKee (2005), Krumholz, McKee & Tumlinson (2009), Renaud, Kraljic & Bouchard (2012), Federrath (2013) or Krumholz (2014).

In the outskirts of spiral galaxies and dwarf irregular galaxies, the SF relation extends into extremely diffuse gas going from  $\Sigma_g \sim 10 \text{ M}_\odot \text{ yr}^{-1}$  towards  $\Sigma_g \sim 1 \text{ M}_\odot \text{ yr}^{-1}$  (Roychowdhury et al. 2009; Bigiel et al. 2010; Bolatto et al. 2011; Elmegreen & Hunter 2015) in which SF proceeds extremely slowly with a roughly constant depletion time of 100 Gyr. Elmegreen (2015, 2018) found an SF relation with a slope of 2 for the outer galaxy if the disc flares (i.e. if the thickness is regulated by gas self-gravity and a radially uniform velocity dispersion). Krumholz (2013) suggested another model, in which SF can occur in an atomic medium with separate cold and warm phases. Krumholz argued that in regions with low SFR (e.g. galactic outskirts), the transition between  $\text{HI}$  and cold star-forming  $\text{H}_2$  is mediated by hydrostatic balance. SF then proceeds slowly, with depletion times of  $\sim 100$  Gyr, in agreement with observations (e.g. Bigiel et al. 2010; Bolatto et al. 2011). Here we show that runaway stars, formed in dense gas and ejected into low-density

regions, naturally explain the observed third regime of SF in galactic outskirts.

Runaway stars are produced by close encounters and binary disruption as a result of stellar evolution in young stellar clusters (Blaauw 1961; Poveda, Ruiz & Allen 1967). These stars have been studied extensively, both observationally (e.g. Gies & Bolton 1986; Gies 1987; Stone 1991; Hoogerwerf, de Bruijne & de Zeeuw 2000; Silva & Napiwotzki 2011; Maíz Apellániz et al. 2018; Dorigo Jones et al. 2020; Raddi et al. 2020) and through modelling (e.g. Ceverino & Klypin 2009; Eldridge, Langer & Tout 2011; Moyano Loyola & Hurley 2013; Oh & Kroupa 2016; Kim & Ostriker 2018; Andersson, Agertz & Renaud 2020). Typically, 5–10 per cent of massive OB-type stars have velocities exceeding  $30 \text{ km s}^{-1}$  and can travel hundreds of pc to several kpc before exploding as core-collapse supernovae (SNe). Moreover, the less massive B stars ( $\sim 4 \text{ M}_\odot$ ) are more numerous and can travel significantly further because of their longer lifetimes ( $\sim 150$  Myr). As such, they can reach the galactic outskirts and contribute to the observational tracers of the SF activity, yet without direct physical connection to the formation sites. By expanding on the results of Andersson et al. (2020), we show in this letter that this mechanism yields an observable signature in striking agreement with SF in galactic outskirts, where gas surface densities are extremely low, as observed by Bigiel et al. (2010).

## 2 NUMERICAL SET-UP

We use the two isolated Milky Way-like galaxies described in Andersson et al. (2020). We compare one (a simulation referred to as runaways), which includes runaway stars where individual stars are tracked both in terms of stellar evolution and kinematically, with an identical simulation ignoring runaway stars (referred to as no runaways). We briefly describe the numerical method here, and refer to Andersson et al. (2020) for details.

We ran the two simulations for 250 Myr using the  $N$ -body + Adaptive Mesh Refinement (AMR) code RAMSES (Teyssier 2002),

\* E-mail: eric@astro.lu.se

which treats dark matter and stars as collisionless particles and computes the fluid dynamics on a grid with adaptive resolution assuming ideal mono-atomic gas with adiabatic index  $\gamma = 5/3$ . Gas cooling is metallicity-dependent and treated using tabulated values. SF is controlled by a density threshold ( $100 \text{ cm}^{-3}$ ) with the SFR density computed from the cell gas density divided by the local free-fall time and scaled with an efficiency of 5 per cent. The details of this method are discussed in Agertz et al. (2013). The resolution of the grid follows a quasi-Lagrangian refinement strategy for which a cell is refined if it contains more than eight particles, or more than  $4014 M_{\odot}$  of baryonic matter, down to a spatial resolution of 9 pc. The initial conditions are the same as those used for the isolated disc in the Project AGORA: Assembling Galaxies Of Resolved Anatomy (Kim et al. 2014, 2016) and give a galaxy similar to the Milky Way, but with a gas fraction of 20 per cent.

Star particles are initially sampled with a mass resolution of  $500 M_{\odot}$  and immediately split into two groups using the initial mass function (IMF) from Kroupa (2001). (i) Low-mass stars (LMS;  $< 8 M_{\odot}$ ) are grouped and represented by a star particle for which we consider mass loss, Fe and O enrichment as well as momentum and energy injection from type Ia supernovae (SNe Ia) and asymptotic giant branch winds (for details, see Agertz et al. 2013). (ii) High-mass stars (HMS;  $\geq 8 M_{\odot}$ ) are treated as individual stars with a feedback model accounting for fast winds and core-collapse SNe. The mass-loss rate from the fast winds is computed with a modified version of the model by Dale & Bonnell (2008) and depends on stellar mass and metallicity. Core-collapse SNe occur when HMS leave the main sequence, which results in the injection of  $10^{51}$  erg of energy in the gas. The main-sequence time is computed with the age–mass–metallicity fit of Raiteri, Villata & Navarro (1996). In cases when the Sedov–Taylor phase of the SN is unresolved (resulting in problems with a self-consistent development of the momentum build up during this phase), we explicitly inject the associated momentum using the method from Kim & Ostriker (2015). This ensures that we capture the effect of SNe even in regions with lower resolution.

In the runaways simulation, we add natal velocity kicks to the HMS sampled from the power-law distribution derived from  $N$ -body simulations of clusters by Oh & Kroupa (2016):

$$f_v \propto v^{-1.8}, \quad v \in [3, 385] \text{ km s}^{-1}. \quad (1)$$

This results in  $\sim 14$  per cent of stars being runaway<sup>1</sup> with a mean velocity of  $90 \text{ km s}^{-1}$ .

### 2.1 Low-mass runaway stars

The model in Andersson et al. (2020) limits the runaway mechanism to massive ( $> 8 M_{\odot}$ ) stars because these stars are responsible for the majority of stellar feedback. In this work, where we focus on tracing the resolved SF relation discussed in Section 1, we extend the model to sample individual stars in the mass range  $4\text{--}100 M_{\odot}$  in order to account for the non-negligible contribution to far-ultraviolet (FUV) emission of low-mass B-stars. These stars are an important contributor to our SF tracer (see Section 3.2). This extension is achieved by resampling the mass<sup>2</sup> of every high-mass

star in the aforementioned mass range using the Kroupa IMF as a post-processing step. For technical reasons, we focus our analysis on  $\sim 150$  Myr of evolution of the galaxy, which roughly corresponds to the main-sequence lifetime of a  $4 M_{\odot}$  star. Therefore, we use this mass as a lower limit, resulting in a mass range between 4 and  $100 M_{\odot}$  for the HMS. We keep equation (1) (which does not have any mass dependence) as the velocity distribution. The resampling increases the stellar mass in the HMS population by  $1.4 \times 10^7 M_{\odot}$ . We remove mass from LMS corresponding to stars in the mass range  $4\text{--}8 M_{\odot}$  as stars in this mass range are now included as HMS, resulting in a decrease in total mass of  $1.7 \times 10^7 M_{\odot}$ . The discrepancy between the two comes from mass loss due to stellar evolution, which is unaccounted for by this resampling.

## 3 RESULTS

### 3.1 Resolution dependence of the SF relation

At the end of the simulation, we derive the local SFR surface density by considering the mass of all stars with an age less than  $\Delta t$  in square bins with sides  $\Delta x$  placed in a uniform grid on the face-on view of the galaxies. We compare this to the gas surface density in the same bins and show the result in Fig. 1 for different choices of  $\Delta t$  (0.1 and 1 kpc) and  $\Delta x$  (2 and 10 Myr). We find that both galaxies follow the empirical relation  $\Sigma_{\text{SFR}} \propto \Sigma_g^{1.4}$  (Kennicutt 1998; red dashed line in Fig. 1) at high gas densities, with a break at  $\sim 10 \times 2013; 100 M_{\odot} \text{ pc}^{-2}$  going into the regime of slow SF.<sup>3</sup> Our galaxies show slightly faster SF at high surface densities ( $\Sigma_g \gtrsim 100 M_{\odot} \text{ pc}^{-2}$ ), although it is within the typical observed scatter in local spiral galaxies (e.g. Wong & Blitz 2002; Crosthwaite & Turner 2007; Kennicutt et al. 2007; Schuster et al. 2007; Bigiel et al. 2008). We find that increasing the resolution in time and space (i.e. decreasing  $\Delta t$  and  $\Delta x$ ) results in less dispersion in the SF relation for both runaways and no runaways. We attribute this to a tighter correlation between newly formed stars and their natal gas clouds. Increasing  $\Delta t$  causes the scatter to increase because of the decoupling between stars and gas due to, for example, stellar feedback, dynamical drift and cloud dissolution. These different decoupling mechanisms have a range of spatial scales and time-scales. By increasing  $\Delta x$ , the variations of the gas density from region to region are averaged out, thus reducing the scatter in Fig. 1. However, increasing the temporal and spatial scales inevitably causes the measurements to deviate from the relation imposed from the local (cell-based) SF law. Similarly to our results, Khoperskov & Vasiliev (2017) found that on small spatial scales ( $\lesssim 100 \text{ pc}$ ) the SF relation, as measured from FUV flux, deviates from that estimated by free-fall collapse of molecular clouds (see equation 21 in Krumholz & McKee 2005). This implies that on such scales the SF relation reflects the various evolutionary stages of individual star-forming clouds, so the relation is lost as clouds are destroyed or stars escape (see also Onodera et al. 2010).

Naturally, we find more scatter in the SF relation in the runaways model, as the velocity kicks amplify the decoupling of the

<sup>1</sup>We define runaway stars as stars with peculiar velocities  $> 30 \text{ km s}^{-1}$ . For a discussion on this value, see Andersson et al. (2020) and references therein.

<sup>2</sup>Assigning new masses inevitably leads to a different stellar evolution. This implies a discrepancy between the stellar evolution of the analysed stars and those evolved in the simulation. This is a limitation of our model, which we take into consideration when drawing conclusions from our results.

<sup>3</sup>We use the terms slow/fast SF to describe trends following long/short depletion times (i.e. lines of constant  $\tau_{\text{dep}} = \Sigma_g / \Sigma_{\text{SFR}}$ ). This is sometimes referred to as SF efficiency (then defined as the inverse of depletion time). In this work, we reserve the term efficiency to describe the conversion of gas mass into stellar mass (without concern for the time-scale). For a more detailed discussion on differences between SF efficiency and depletion time, see, for example, Semenov, Kravtsov & Gnedin (2018) and Renaud et al. (2019).

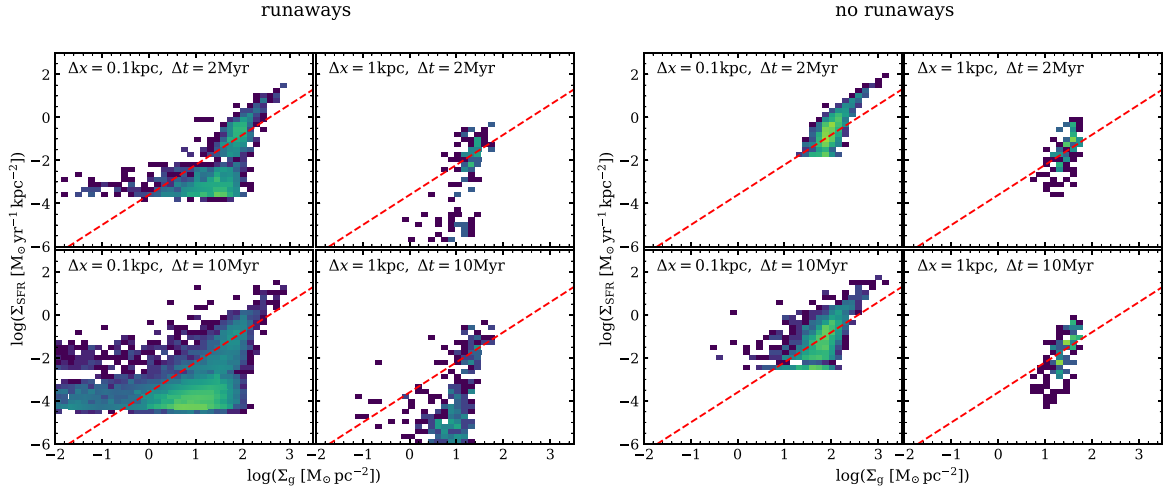

**Figure 1.** SFR surface density as a function of gas surface density for different resolutions in space ( $\Delta x$ ) and time ( $\Delta t$ ) for the models with (left) and without (right) runaway stars. Small values for  $\Delta x$  and  $\Delta t$  result in the tightest coupling between stars and gas. To guide the eye, the canonical SF relation with a slope of 1.4 (Kennicutt 1989, 1998) is shown by the red dashed line.

runaway stars from their natal gas. This masquerades as SF activity in regions of low  $\Sigma_g$ , as best seen in the left panels at  $-1 \lesssim \log(\Sigma_g) \lesssim 0$  and  $\log(\Sigma_{\text{SFR}}) \sim -2$ .

In all panels of Fig. 1, there is a floor in  $\Sigma_{\text{SFR}}$  (most clearly visible for  $\Delta x = 0.1$  kpc). This floor is a result of having a single star particle within a bin of size  $\Delta x$ , and is therefore set by the finite resolution in stellar masses. In runaways, the resolution is  $4 M_\odot$ , while in the no runaways simulation, it is the mass of the entire unresolved stellar population. As discussed earlier, increasing  $\Delta t$  allows stars to travel further, reaching a larger range of densities. For very long time-scales ( $\sim 100$  Myr), runaway stars reach the outskirts of the galaxy, as discussed in the remainder of Section 3.

### 3.2 Runaway stars explain the observed low $\Sigma_{\text{SFR}}$

To avoid arbitrary time-scales ( $\Delta t$ ), we create mock observations of the FUV flux. These are shown in Fig. 2 as surface brightness maps (left panel) from which we derive the SFR density. In the right panels, we plot them against the surface density of neutral and molecular hydrogen  $\Sigma_{\text{H I}+\text{H}_2}$  (centre panels). This accounts for the dimming of FUV luminosity due to stellar evolution. Thus, it introduces a self-consistent time-scale, and lifts the requirement for an arbitrary  $\Delta t$ . This measurement of SFR is therefore consistent with that estimated observationally. Appendix A details how we produce and observe the mock spectra. The SFR is then computed as

$$\text{SFR} (M_\odot \text{ yr}^{-1}) = 0.68 \times 10^{-28} I_{\text{FUV}} (\text{erg s}^{-1} \text{ Hz}^{-1}), \quad (2)$$

where  $I_{\text{FUV}}$  is the FUV intensity integrated over the *GALEX*-FUV filter. We calibrate the  $I_{\text{FUV}}$  such that the global SFR is the same as that measured in the simulation, as detailed in Appendix A. Equation (2) is identical to that derived by Salim et al. (2007) and later adopted by Leroy et al. (2008) and Bigiel et al. (2010). Note that this is the unobstructed SFR (not accounting for the contribution of embedded SF observed in infrared re-emission), and is therefore a lower limit of the SFR. However, our main finding is the feature in the low gas density regime, where the SFR densities are largely unaffected by extinction.

As shown in the top-right panel of Fig. 2, we find a radial dependence in the branch at low  $\Sigma_g$  and low  $\Sigma_{\text{SFR}}$ . In fact, we

find that the transition into this feature corresponds to the regions outside the star-forming disc ( $\gtrsim 10$  kpc), thus explaining the absence of this branch in the no runaways simulation. The signal arises because the runaway mechanism ejects stars into regions where the density is too low for SF to be active. This creates the illusion of SF in gas with extremely low density, seen as the aforementioned feature extending from  $\Sigma_{\text{SFR}} \sim 10^{-4} M_\odot \text{ yr}^{-1} \text{ kpc}^{-2}$ , towards the bottom left. Initially, the branch roughly extends along a line of constant depletion time (shown by dashed lines) corresponding to extremely slow SF ( $\tau_{\text{dep}} = 100$  Gyr), and flattens out as it reaches very low  $\Sigma_{\text{H I}+\text{H}_2}$  ( $\leq 0.1 M_\odot \text{ pc}^{-2}$ ). A comparison to measurements of SF in outer regions of observed spiral galaxies (Bigiel et al. 2010) reveals a striking similarity to the feature produced by our runaway model. How far out the branch extends radially depends on the runaway model (i.e. the velocity distribution and the mass distribution of the stars), as discussed in Section 4.

The middle panels of Fig. 2 compare the gas structure between runaways and no runaways. The runaways (top) simulation features large under-dense regions within the star-forming disc (a few kpc from the centre). The repeated transport of runaway stars into low-density medium (e.g. inter-arm) allows these feedback bubbles to expand to large volumes and to survive for longer time-scales compared with the no runaways case where they are confined to dense media. As in the galactic outskirts,  $\log(\Sigma_{\text{SFR}}) \sim -6$ , these low gas surface density regions at  $\log(\Sigma_{\text{SFR}}) \sim -2$  harbour an unexpected SF activity introduced by the presence of runaway stars. Contrary to the galactic outskirts, these measurements are indicative of fast SF ( $\tau_{\text{dep}} \sim 10$  Myr) as seen in the top-right panel of Fig. 2, because runaway stars are more abundant in the inner parts of galactic discs.

## 4 DISCUSSION

The physical process responsible for the observational detection of young stars at gas surface densities as low as  $1 M_\odot \text{ pc}^{-2}$  in resolved galaxies (e.g. Bigiel et al. 2008, 2010; Wyder et al. 2009; Elmegreen & Hunter 2015) has been debated (see Krumholz 2014 for a review). Elmegreen (2015) argued that the longer depletion times in the outskirts arises from disc flaring, which reduces the

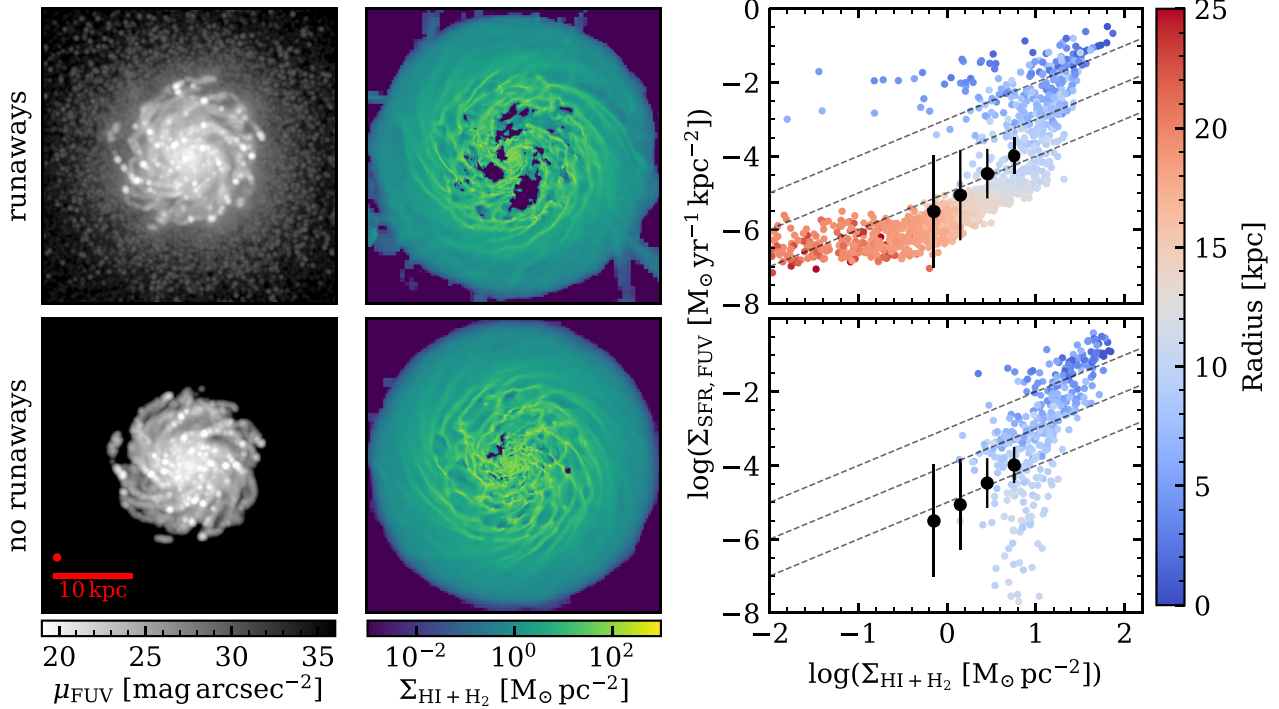

**Figure 2.** Left: FUV surface brightness maps derived by assigning spectra to each star (see text for details). Each pixel has been convolved with a Gaussian filter with FWHM of 4 arcsec converted to physical units by assuming a distance of 20 Mpc to the galaxies. The point spread function is shown by the red circle. Center: surface density of H I and H<sub>2</sub> gas along the line of sight. The scale is the same as in the left panel. Right: resolved SFR density as a function of gas surface density colour-coded by distance to the centre of the galaxy.  $\Sigma_{\text{SFR, FUV}}$  is computed from FUV intensity (equation 2), in 1-kpc squares. The colour-coding clearly shows that the low  $\Sigma_{\text{SFR}}$  feature is a radial trend related to the inclusion of runaway stars. The black dots with error bars show the mean and scatter for the resolved KS relation observed in the outer regions of spiral galaxies by Bigiel et al. (2010). The dashed lines correspond to constant depletion times of 100, 10 and 1 Gyr from bottom to top, respectively.

local volume density of gas, while keeping the surface density relatively high. This contradicts our *no runaways* model, where such a feature should be visible. Krumholz (2013) suggested that the trend at low  $\Sigma_{\text{SFR}}$  can be explained by inefficient SF in molecule-poor gas in the outskirts of galaxies. A key property of their model is the background interstellar radiation, which we do not take into account in the SF law in our simulations. Therefore, we cannot rule out low levels of SF in molecule-poor gas in the galactic outskirts. Nevertheless, runaway stars, as modelled in this work, must contribute to the observed SF signal, at least to some extent. A full understanding of the contribution from runaway stars likely requires advanced models with full *N*-body treatment of all stellar clusters, including consistent descriptions of the clusters' natal properties, such as the binary fraction. Furthermore, this needs to be taken into account over cosmological times to obtain a self-consistent local FUV background. This is beyond the scope of current models.

Star formation in very diffuse gas could either reflect *in situ* SF, or result from the rapid migration of stars, as we advocate here. As discussed above, the former case calls for an additional SF regime. However, the two possibilities would lead to a different stellar mass function. By comparing FUV flux with H $\alpha$  emission from H II regions, Meurer et al. (2009) found a deficit of massive O stars associated with the FUV bright outskirts (see also Werk et al. 2010). Note that there is a debate surrounding their conclusions (see Fumagalli, da Silva & Krumholz 2011; Andrews et al. 2013, 2014). Unless arguing for a non-universal IMF (e.g. Pflamm-Altenburg &

Kroupa 2008), a deficit in O stars supports our scenario as we find that the main contributors to the FUV signal are stars in the mass range 5–7  $M_{\odot}$ , with almost no contribution from O stars with mass  $>20 M_{\odot}$ .

In this work, we apply a model that treats stars as individual particles on galactic scales, which is numerically challenging. In order to reduce computational costs, the model in Andersson et al. (2020) is limited to massive stars ( $>8 M_{\odot}$ ) because these trace the majority of stellar feedback. In this work, we have extended the model to include individual stars down to 4  $M_{\odot}$ , thus accounting for their contribution to the FUV flux in galaxies.<sup>4</sup> The velocity distribution (equation 1) is that of all stars in a natal cluster, implying that in principle we can choose to resample for any stellar masses. However, because of mass segregation and the dynamics of many-body interactions, the velocity distribution is known to be mass-dependent. More massive stars are more likely to receive stronger kicks. Maíz Apellániz et al. (2018) estimated that, in the field, 10–12 per cent of O stars are runaways, while this fraction is reduced to  $\sim 6$  per cent for B stars (see also Eldridge et al. 2011). In future work, we will investigate how our results depend on varying the distribution of kick velocities.

<sup>4</sup>Although the contribution to FUV intensity is limited for low-mass stars, their long main-sequence lifetime makes them important for the radial dependence of the SF relations.



## 5 SUMMARY AND CONCLUSIONS

Using hydrodynamic simulations of an isolated Milky Way-like galaxy (Andersson et al. 2020), we show how runaway stars change the appearance of SF, as seen in the  $\Sigma_g$ – $\Sigma_{\text{SFR}}$  plane. We demonstrate how the SF relation depends sensitively on the spatial and temporal scales over which they are averaged. This sensitivity is increased by runaway stars, because their high velocities imply that they quickly leave their natal environments. By estimating the SFR from the FUV intensity, we remove the necessity of choosing an ad hoc time-scale and we produce a SF relation consistent with that derived from observations.

Our main result is a feature in the SF relation at  $\Sigma_{\text{SFR}} \sim 10^{-4}$ – $10^{-6} \text{ M}_{\odot} \text{ yr}^{-1} \text{ kpc}^{-2}$  in low surface density gas, with a galactocentric radial dependence, found exclusively in our model including runaway stars. This feature is in excellent agreement with that observed in the outer regions of spiral galaxies (Bigiel et al. 2010). We show that this feature arises by ejecting massive FUV emitting stars (via the runaway mechanism) from SF regions into low-density gas. This results in the presence of young stars in gas with densities that are too low to trigger SF. Therefore, it produces an unexpected signature of SF, with a strong radial dependence.

In conclusion, we argue that the SF relation in the outer regions of spiral galaxies is produced by a small, albeit observable, population of individual stars formed in denser environments and transported there by the runaway mechanism. Although our model cannot rule out SF in atomic gas (Krumholz 2013), runaway stars are at the very least a contributing, if not dominant, factor to establishing the SF relation in outer regions of galaxies.

## ACKNOWLEDGEMENTS

We thank the anonymous referee for comments that have improved this letter. We also express gratitude for the stimulating discussions at the 2020 Ringberg Virtual Seminar Series. EA acknowledges discussions with Mark Krumholz. We acknowledge support from the Knut and Alice Wallenberg Foundation, the Swedish Research Council (grant 2014-5791) and the Royal Physiographic Society of Lund. We used computational resources at LUNARC hosted at Lund University, on the Swedish National Infrastructure for Computing (SNIC 2018/3-649), as well as allocation LU 2019/2-27.

## DATA AVAILABILITY

The data underlying this article will be shared on reasonable request to the corresponding author.

## REFERENCES

Agertz O., Kravtsov A. V., Leitner S. N., Gnedin N. Y., 2013, *ApJ*, 770, 25  
 Andersson E. P., Agertz O., Renaud F., 2020, *MNRAS*, 494, 3328  
 Andrews J. E. et al., 2013, *ApJ*, 767, 51  
 Andrews J. E. et al., 2014, *ApJ*, 793, 4  
 Bigiel F., Leroy A., Walter F., Brinks E., de Blok W. J. G., Madore B., Thornley M. D., 2008, *AJ*, 136, 2846  
 Bigiel F., Leroy A., Walter F., Blitz L., Brinks E., de Blok W. J. G., Madore B., 2010, *AJ*, 140, 1194  
 Blaauw A., 1961, *Bulletin of the Astronomical Institutes of the Netherlands*, 15, 265  
 Bolatto A. D. et al., 2011, *ApJ*, 741, 12  
 Ceverino D., Klypin A., 2009, *ApJ*, 695, 292  
 Crosthwaite L. P., Turner J. L., 2007, *AJ*, 134, 1827  
 Dale J. E., Bonnell I. A., 2008, *MNRAS*, 391, 2

Dorigo Jones J., Oey M. S., Paggeot K., Castro N., Moe M., 2020, *ApJ*, 903, 43  
 Eldridge J. J., Langer N., Tout C. A., 2011, *MNRAS*, 414, 3501  
 Elmegreen B. G., 2015, *ApJ*, 814, L30  
 Elmegreen B. G., 2018, *ApJ*, 854, 16  
 Elmegreen B. G., Hunter D. A., 2015, *ApJ*, 805, 145  
 Federrath C., 2013, *MNRAS*, 436, 3167  
 Fumagalli M., da Silva R. L., Krumholz M. R., 2011, *ApJ*, 741, L26  
 Gies D. R., 1987, *ApJS*, 64, 545  
 Gies D. R., Bolton C. T., 1986, *ApJS*, 61, 419  
 Hoogerwerf R., de Bruijne J. H. J., de Zeeuw P. T., 2000, *ApJ*, 544, L133  
 Jonsson P., 2006, *MNRAS*, 372, 2  
 Kennicutt R. C., 1989, *ApJ*, 344, 685  
 Kennicutt R. C., 1998, *ApJ*, 498, 541  
 Kennicutt R. C., Evans N. J., 2012, *ARA&A*, 50, 531  
 Kennicutt R. C. et al., 2007, *ApJ*, 671, 333  
 Khoperskov S. A., Vasiliev E. O., 2017, *MNRAS*, 468, 920  
 Kim J.-h. et al., 2014, *ApJS*, 210, 14  
 Kim J.-h. et al., 2016, *ApJ*, 833, 202  
 Kim C.-G., Ostriker E. C., 2015, *ApJ*, 802, 99  
 Kim C.-G., Ostriker E. C., 2018, *ApJ*, 853, 173  
 Kroupa P., 2001, *MNRAS*, 322, 231  
 Krumholz M. R., 2013, *MNRAS*, 436, 2747  
 Krumholz M. R., 2014, *Phys. Rep.*, 539, 49  
 Krumholz M. R., McKee C. F., 2005, *ApJ*, 630, 250  
 Krumholz M. R., McKee C. F., Tumlinson J., 2009, *ApJ*, 699, 850  
 Leitherer C. et al., 1999, *ApJS*, 123, 3  
 Leitherer C., Ortiz Otálvaro P. A., Bresolin F., Kudritzki R.-P., Lo Faro B., Pauldrach A. W. A., Pettini M., Rix S. A., 2010, *ApJS*, 189, 309  
 Leitherer C., Ekström S., Meynet G., Schaerer D., Agienko K. B., Levesque E. M., 2014, *ApJS*, 212, 14  
 Leroy A. K., Walter F., Brinks E., Bigiel F., de Blok W. J. G., Madore B., Thornley M. D., 2008, *AJ*, 136, 2782  
 Li A., Draine B. T., 2001, *ApJ*, 554, 778  
 Maíz Apellániz J., Pantaleoni González M., Barbá R. H., Simón-Díaz S., Negueruela I., Lennon D. J., Sota A., Trigueros Páez E., 2018, *A&A*, 616, A149  
 Meurer G. R. et al., 2009, *ApJ*, 695, 765  
 Moyano Loyola G. R. I., Hurley J. R., 2013, *MNRAS*, 434, 2509  
 Oh S., Kroupa P., 2016, *A&A*, 590, A107  
 Onodera S. et al., 2010, *ApJ*, 722, L127  
 Pflamm-Altenburg J., Kroupa P., 2008, *Nature*, 455, 641  
 Poveda A., Ruiz J., Allen C., 1967, *Boletín de los Observatorios Tonantzintla y Tacubaya*, 4, 86  
 Raddi R., Irrgang A., Heber U., Schneider D., Kreuzer S., 2020, *A&A*, in press( )  
 Raiteri C. M., Villata M., Navarro J. F., 1996, *A&A*, 315, 105  
 Renaud F., Kraljic K., Bournaud F., 2012, *ApJ*, 760, L16  
 Renaud F., Bournaud F., Agertz O., Kraljic K., Schinnerer E., Bolatto A., Daddi E., Hughes A., 2019, *A&A*, 625, A65  
 Roychowdhury S., Chengalur J. N., Begum A., Karachentsev I. D., 2009, *MNRAS*, 397, 1435  
 Salim S. et al., 2007, *ApJS*, 173, 267  
 Schaye J., 2004, *ApJ*, 609, 667  
 Schmidt M., 1959, *ApJ*, 129, 243  
 Schuster K. F., Kramer C., Hirschfeld M., Garcia-Burillo S., Mookerjee B., 2007, *A&A*, 461, 143  
 Semenov V. A., Kravtsov A. V., Gnedin N. Y., 2018, *ApJ*, 861, 4  
 Silva M. D. V., Napiwotzki R., 2011, *MNRAS*, 411, 2596  
 Stone R. C., 1991, *AJ*, 102, 333  
 Teyssier R., 2002, *A&A*, 385, 337  
 Vázquez G. A., Leitherer C., 2005, *ApJ*, 621, 695  
 Werk J. K. et al., 2010, *AJ*, 139, 279  
 Wong T., Blitz L., 2002, *ApJ*, 569, 157  
 Wyder T. K. et al., 2009, *ApJ*, 696, 1834

**APPENDIX A: GENERATING SYNTHETIC SPECTRA FOR STELLAR POPULATIONS**

The mock observations used in this work are derived by combining a wave propagation method similar to that used in SUNRISE (Jonsson 2006) with stellar spectra from a modified version of the stellar population synthesis code STARBURST99 (Leitherer et al. 1999, 2010, 2014; Vázquez & Leitherer 2005). All HMS use evolving spectra for individual stars while LMS use an evolving spectra from the stellar population with stars in the relevant mass range. The spectra of each source are propagated through the gas at the highest AMR resolution ( $\sim 9$  pc) to the observer. We account for extinction using a dust attenuation curve from Li & Draine (2001) assuming a uniform dust-to-gas ratio of 0.01. We compute the photometric intensity in the *GALEX*-FUV band for the stars that formed during the simulation (i.e. younger than 250 Myr). To account for missing FUV flux from unresolved populations and loss of mass due to sampling new masses for HMS particles (see Section 2.1), we artificially boost  $I_{\text{FUV}}$  such

that the global SFR derived from equation (2) matches that from the simulation. Furthermore, we apply a Gaussian filter with FWHM of 4 arcsec (i.e. standard deviation of  $\sigma = 1.7$  arcsec) to all pixels to simulate the angular resolution of the *GALEX* satellite. To convert to physical units, we assume a distance of 20 Mpc. The surface brightness maps were computed from the magnitudes using

$$m_{\text{FUV}} = -2.5 \log \left( \frac{f_{\nu}}{\text{erg s}^{-1} \text{cm}^{-2} \text{Hz}^{-1}} \right) - 48.6, \quad (\text{A1})$$

where  $f_{\nu}$  is the spectral flux density in the *GALEX*-FUV band. When we compute  $f_{\nu}$  we assume an initial distance of 10 pc and add a distance modulus corresponding to 20 Mpc. For the conversion to surface brightness, we compute the pixel angular size at a distance of 20 Mpc.

This paper has been typeset from a  $\text{\LaTeX}$  file prepared by the author.
